# Supplementary material for: Root-specific camalexin biosynthesis controls the plant growth-promoting effects of multiple bacterial strains
Source: PubMed Central journal article supplement — Proc Natl Acad Sci U S A. 2019 Jul 16;116(31):15735–44. doi: 10.1073/pnas.1818604116 (PMC6681745; doi:10.1073/pnas.1818604116), 2019-07-16
Supplement: pnas.1818604116.sapp.pdf [file pnas.1818604116.sapp.pdf]

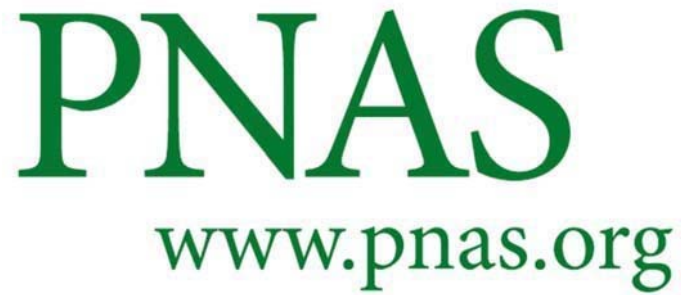

## Supplementary Information for

Root-specific camalexin biosynthesis controls the plant growth promoting effects of multiple bacterial strains

Anna Koprivova, Stefan Schuck, Richard P. Jacoby, Irene Klinkhammer, Bastian Welter, Lisa Leson, Anna Martyn, Julia Nauen, Niklas Grabenhorst, Jan F. Mandelkow, Alga Zuccaro, Jürgen Zeier, Stanislav Kopriva

Corresponding author  
Stanislav Kopriva  
Email: [skopriva@uni-koeln.de](mailto:skopriva@uni-koeln.de)

### **This PDF file includes:**

Figs. S1 to S15

Tables S1 to S6

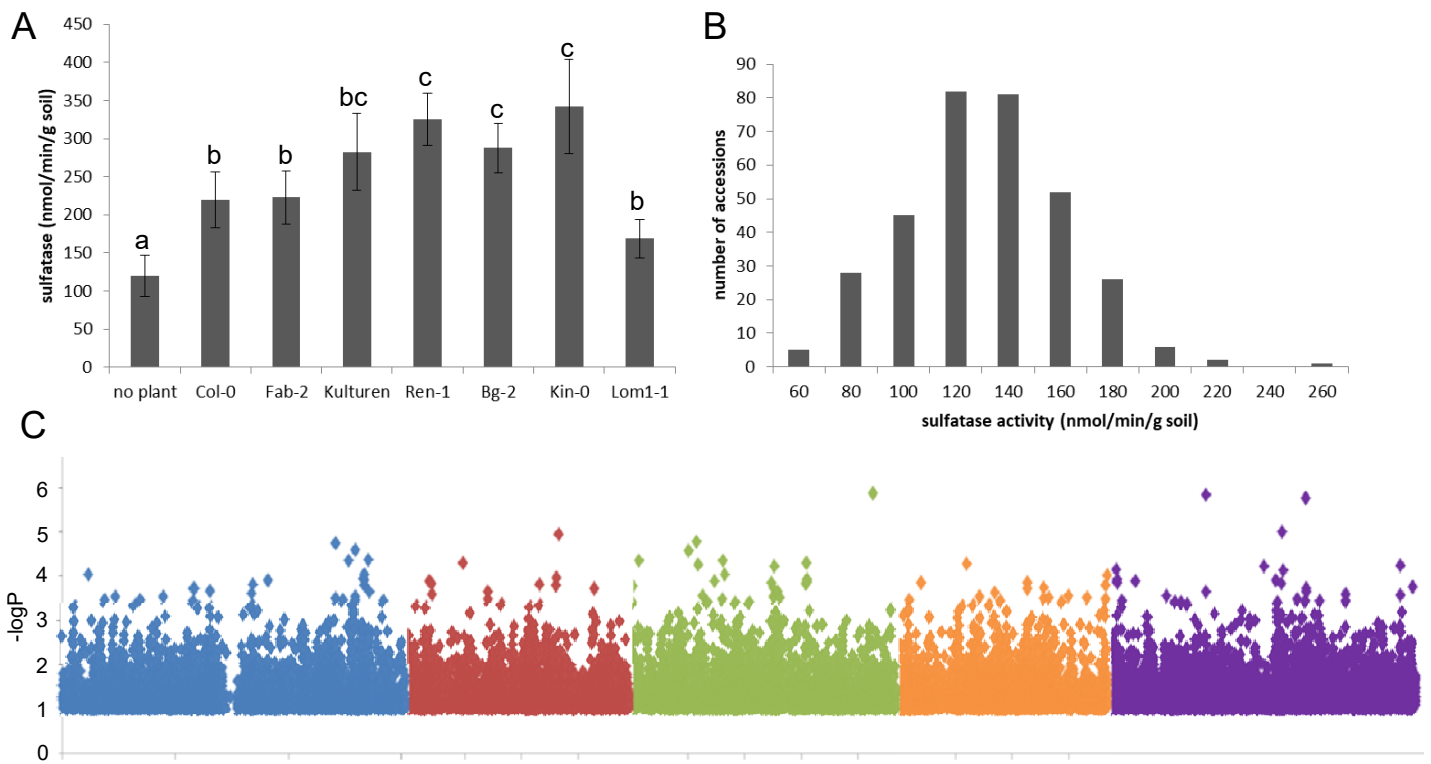

**Fig. S1. Natural variation in sulfatase activity**

**A** Sulfatase activity in a typical tray. Plants were grown for 2 weeks in soil (10%)/sand mixture, afterwards 2 soil samples were taken per plant and sulfatase activity was measured. Data are presented as means and S.E. from 10 samples derived from 5 independent plants. Different letters mark statistically different values (one way ANOVA).

**B** Distribution of the sulfatase activity among *Arabidopsis* accessions. Sulfatase activity was determined in soil from 173 *Arabidopsis* accessions varieties. Shown is the frequency of the activity among the 173 accessions.

**C** Manhattan plot of GWAS results obtained by GWAPP. Plotted are scores as  $-\log_{10}p$  for each marker on the 5 *Arabidopsis* chromosomes.

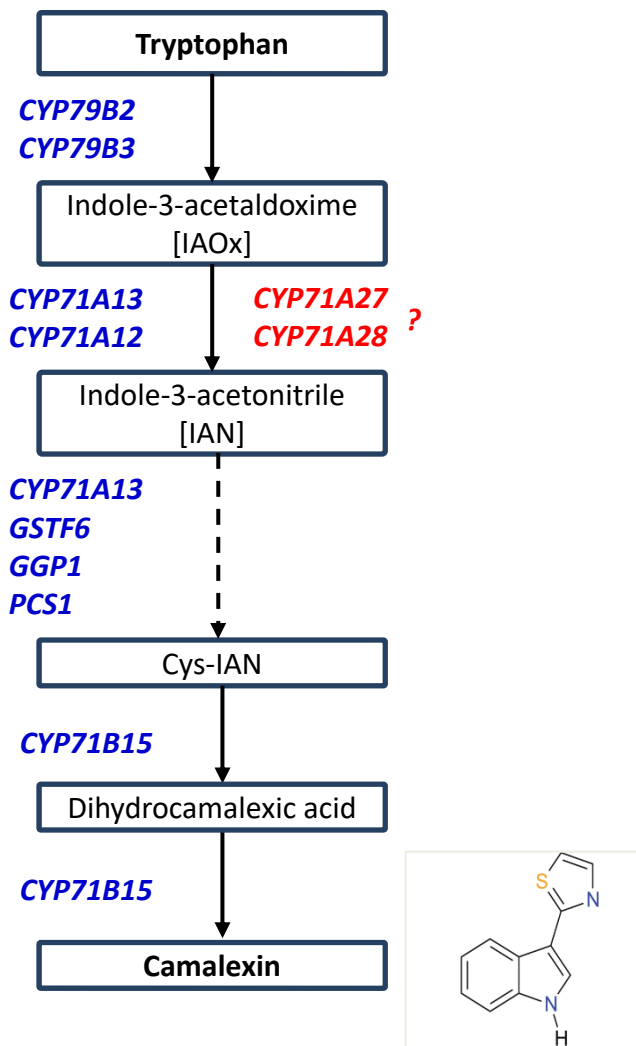

**Fig. S2. Scheme of camalexin biosynthesis pathway.**

Scheme adapted from Su et al. (2011). The possible position of the newly characterised CYP71A27 and CYP71A28 is indicated in red with a question mark.

|                        | <i>cyp71A27</i> | <i>cyp71A28</i> | <i>cyp71A12</i> | <i>cyp71A13</i> |
|------------------------|-----------------|-----------------|-----------------|-----------------|
| <b><i>CYP71A12</i></b> | 9.9             | 5.02            | 0               | 5.33            |
| <b><i>CYP71A13</i></b> | 6.38            | 3.94            | 10              | 0               |
| <b><i>CYP71A27</i></b> | 0               | 0.7             | 1.05            | 0.49            |
| <b><i>CYP71A28</i></b> | 1.71            | 0               | 1.29            | 0.86            |
| <b><i>GST6</i></b>     | 3.32            | 1.45            | 3.79            | 3.04            |
| <b><i>GGP</i></b>      | 0.79            | 0.64            | 0.77            | 0.6             |
| <b><i>CYP71B15</i></b> | 0.94            | 0.56            | 1.03            | 0.83            |
| <b><i>MAM</i></b>      | 1.26            | 1.17            | 1.4             | 1.24            |
| <b><i>TSB</i></b>      | 1               | 1               | 1               | 1.06            |
| <b><i>CYP79F1</i></b>  | 0.28            | 0.39            | 1.44            | 0.05            |
| <b><i>CYP79B2</i></b>  | 0.56            | 0.56            | 0.65            | 0.32            |
| <b><i>MYB28</i></b>    | 0.83            | 0.91            | 0.93            | 0.87            |
| <b><i>MYB51</i></b>    | 1.43            | 0.89            | 1.2             | 0.94            |
| <b><i>SUR1</i></b>     | 0.93            | 0.53            | 0.58            | 0.57            |
| <b><i>SOT16</i></b>    | 1               | 0.61            | 0.64            | 0.63            |
| <b><i>SOT17</i></b>    | 1               | 0.66            | 0.86            | 0.52            |

**Fig. S3. Expression analysis of mutants in P-450 71A genes potentially involved in camalexin synthesis**

RNA was isolated from roots of the 5 genotypes and accumulation of transcripts for genes of camalexin (black) and glucosinolate (red) synthesis was compared by qPCR. Data are shown relative to expression in Col-0, red boxes mark transcripts accumulating to a greater extent in the mutants and blue boxes indicate those that are repressed. The analysis was performed with three independent RNAs measured in duplicates.

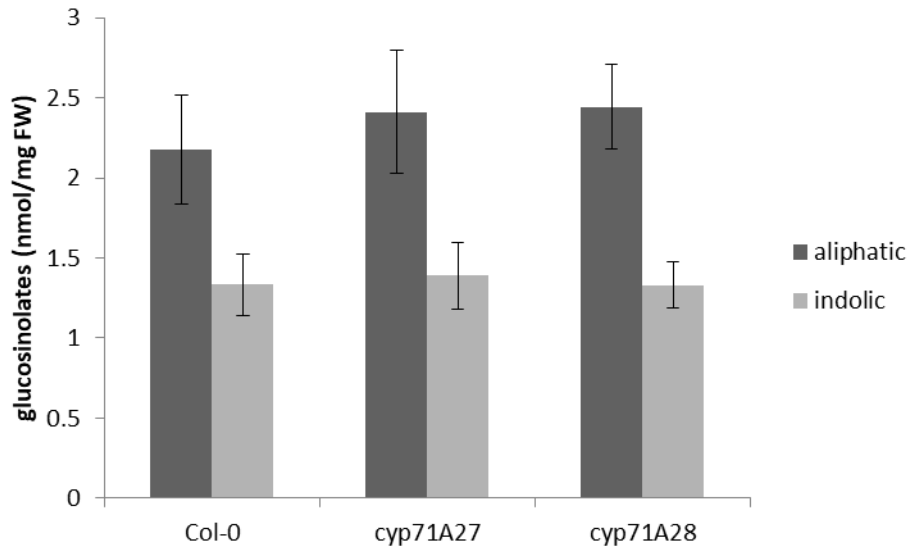

**Fig. S4. Glucosinolate accumulation is not affected by loss of *CYP71A27* and *CYP71A28***  
 Col-0, *cyp71A27*, and *cyp71A28* plants were grown for 2.5 weeks on vertical agarose plates. Glucosinolate accumulation was determined in leaves by HPLC. Data are presented as means and S.D. from 4 biological replicates consisting of 2 shoots.

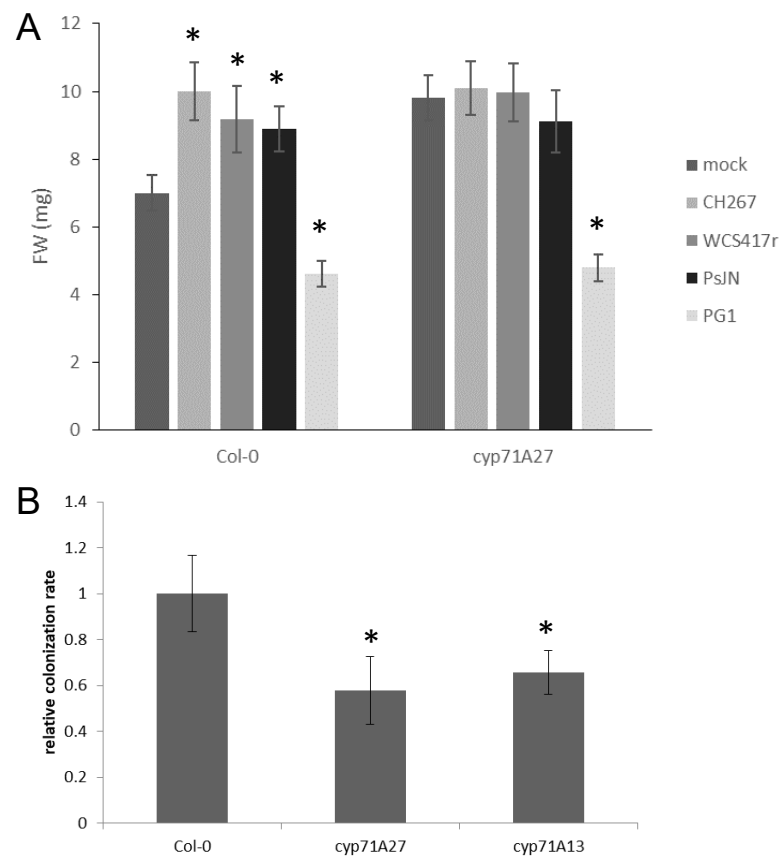

**Fig. S5. CYP71A27 and CYP71A13 are important for plant microbe interaction.**

**A** Col-0 and *cyp71A27* were grown for 2 weeks in presence of *Pseudomonas* sp. CH267, *P. simiae* WCS417r, *Paraburkholderia phytofirmans* PsJN, *Burkholderia glumae* PG1 or 10  $\mu$ M  $MgCl_2$  as mock, and the fresh weight of the whole plants was measured. Data are presented as means and S.E. from at least 20 plants grown on 4 independent plates. Asterisks indicate significant differences between mock and bacterial treatment at  $p < 0.05$  (Student's T-test).

**B** Col-0, *cyp71A27*, and *cyp71A13* were grown for 2 weeks in presence of *Serendipita indica*, and the colonization rate was determined by quantification of fungal DNA in roots. Data are presented as relative abundance of fungal *SiTEF* transcripts compared to Arabidopsis *UBQ5* transcripts and as means and S.D. from 4 independent biological repetitions. The value in Col-0 was set to 1, asterisks indicate significant differences to Col-0 at  $p < 0.05$  (Student's T-test).

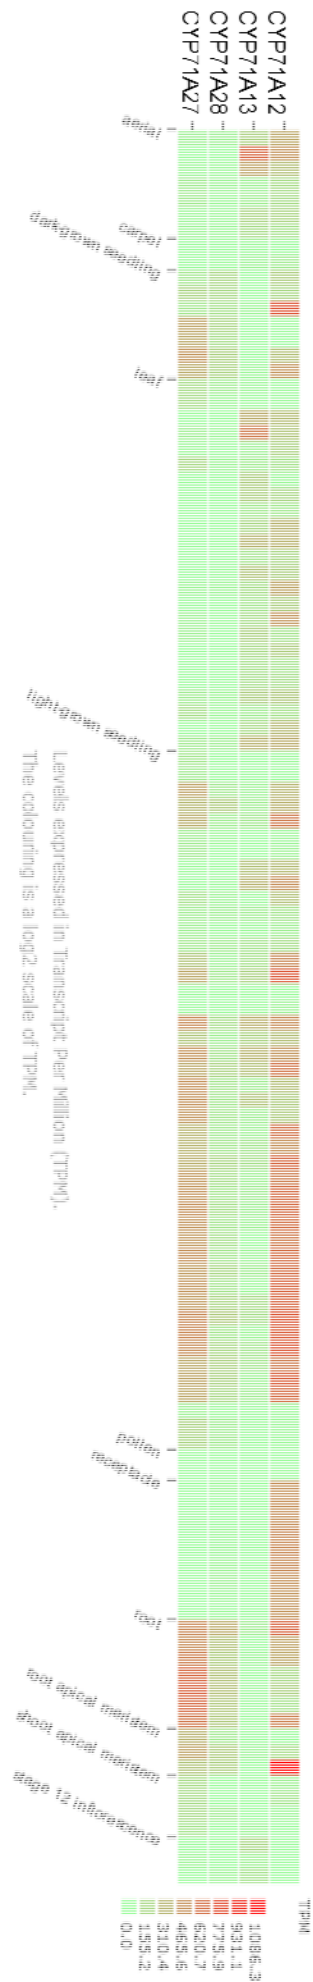

**Fig. S6. Expression of CYP71A27 and related CYP71 genes in different tissues.**

The data was obtained from the Araport portal and show gene expression profiles in *Arabidopsis thaliana* developmental stages, organs and parts based on RNA-seq analysis. The transcript levels are shown in transcripts per million (TPM) and coloured according to log<sub>2</sub>TPM.

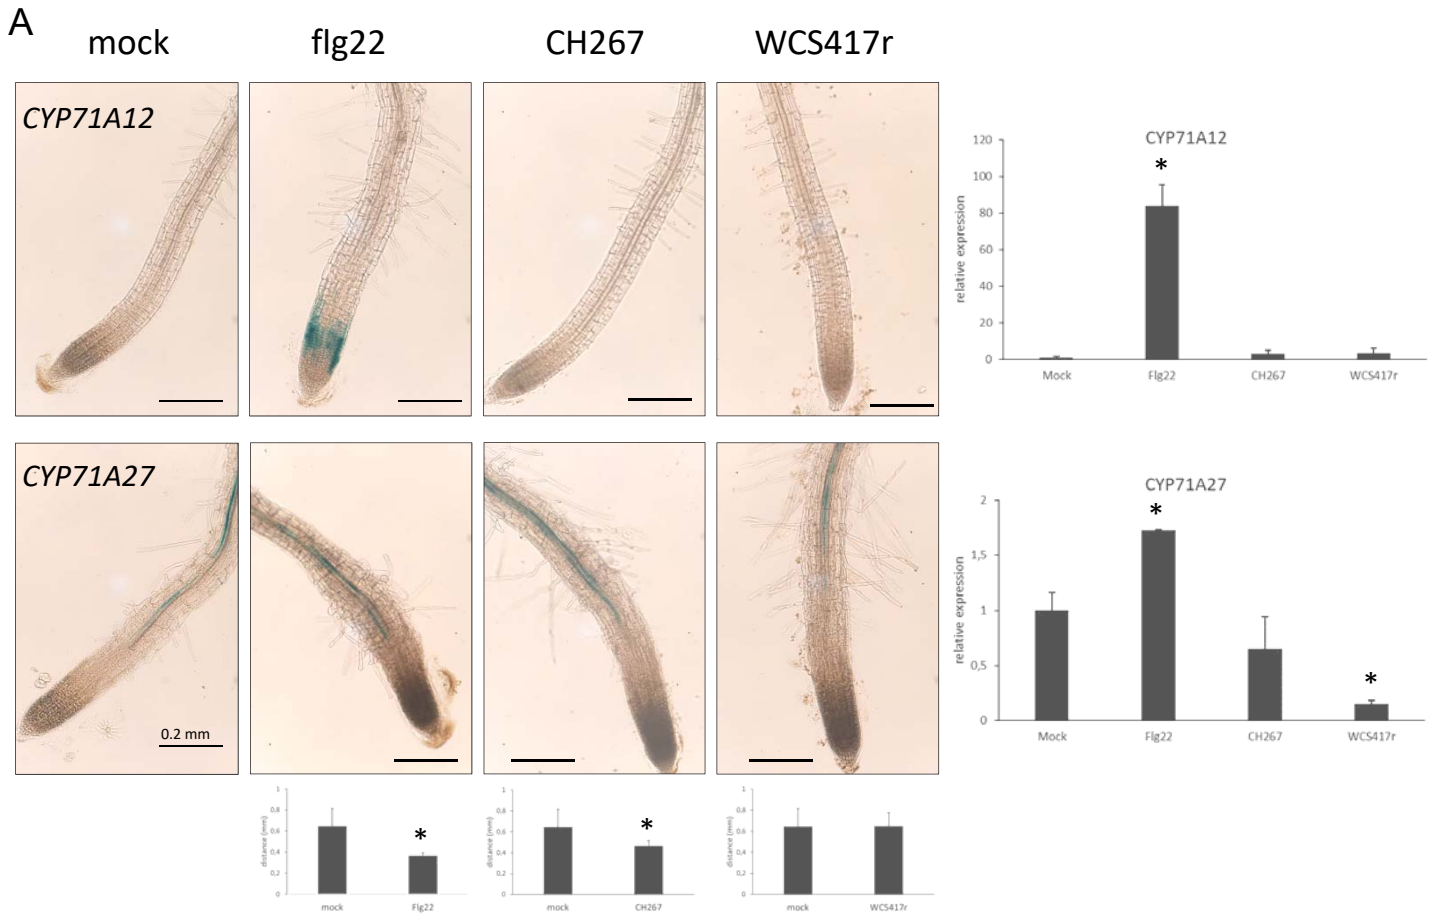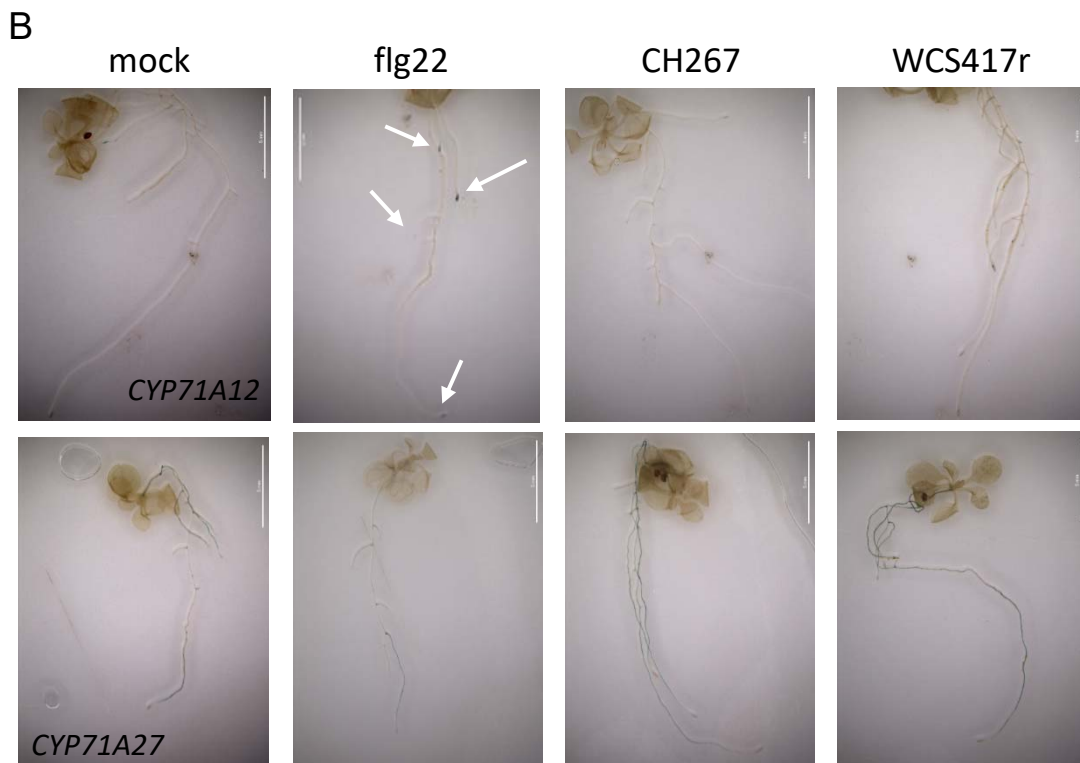



**Fig. S7. CYP71A27 has a different expression pattern from CYP71A12**

GUS stainings of transgenic plants expressing *CYP71A12pro::GUS* (21) (upper panel) and *CYP71A27pro::GUS* (bottom panel).

**A** Seven days old seedlings were transferred to liquid nutrient solution and treated with *Pseudomonas* sp. CH267 and *P. simiae* WCS417r (final OD<sub>600</sub>=0.002), 1 μM flg22, or 10 μM MgCl<sub>2</sub> as mock for 24 hours before GUS staining. Scale bars, 0.2 mm. Photos representative of at least 7 plants.

Bottom row: The distance between root tip to the beginning of GUS staining was measured in *CYP71A27pro::GUS* plants after the different treatments and compared to mock. Data are shown as means and S.D. from at least 7 plants.

Right column: Expression analysis of *CYP71A12* and *CYP71A27*. RNA was isolated from roots of the treated seedlings and accumulation of transcripts for *CYP71A12* and *CYP71A27* was compared by qPCR. The analysis was performed with three independent RNAs measured in duplicates, data are shown as means and S.D. expression in mock is set to 1.

Asterisks indicate significant differences to mock at p<0.05 (one way ANOVA).

**B** Five days old seedlings were transferred on plates containing *Pseudomonas* sp. CH267 and *P. simiae* WCS417r (final OD<sub>600</sub>=3.2 x 10<sup>-6</sup>) or 10 μM MgCl<sub>2</sub> and cultivated for 7 days. For flagellin treatment 2 week old plants were treated with 1 μM flg22 for 5 h. The plants were stained for GUS activity and photos were made with a Leica MZ 16 F stereomicroscope. Scale bars, 5 mm. Photos representative of at least 6 plants. Arrows point to flg22-induced expression of *CYP71A12* in root tips.

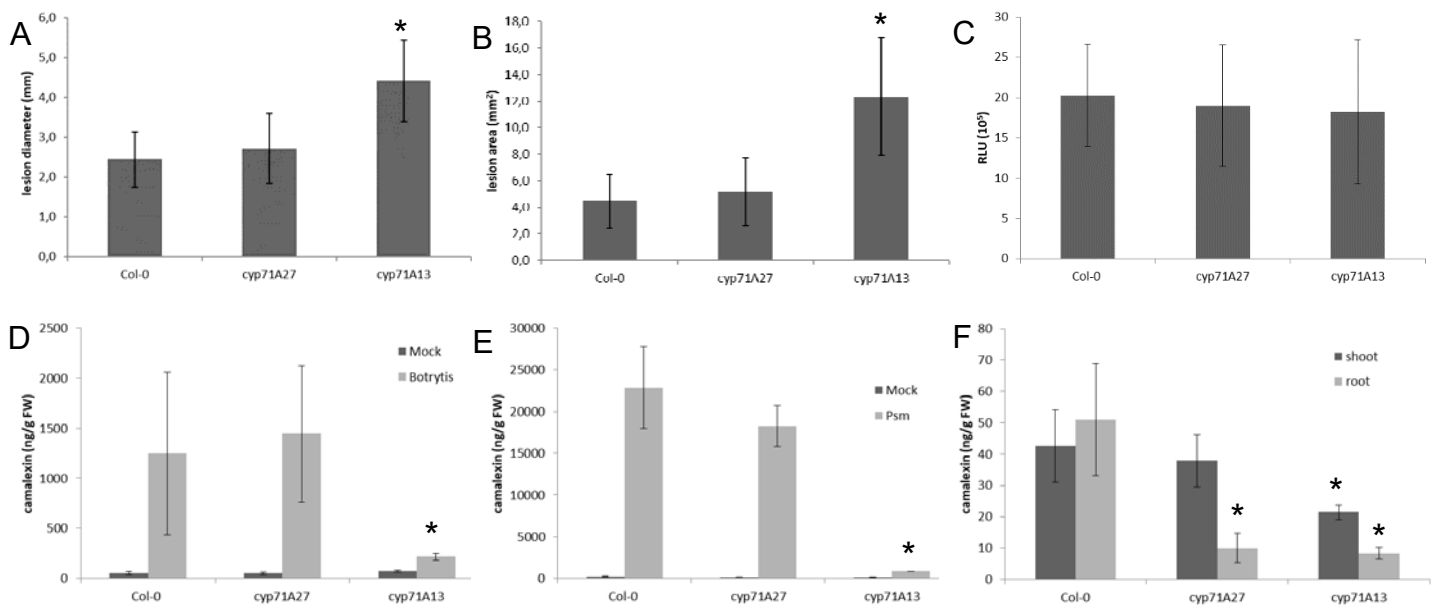

### Fig. S8. CYP71A27 is not involved in pathogen defense in the leaves

Col-0, *cyp71A27*, and *cyp71A13* plants were grown for 4 weeks at short days and inoculated with pathogens.

Three leaves per each of 6 plants were inoculated with four 5  $\mu$ l droplets containing *Botrytis cinerea* B05.10 spores ( $5 \times 10^4$ /ml). After 3 days the lesion diameter (**A**) and area (**B**) were determined. Shown are means and S.E. from 72 lesion measurements.

**C** Leaves were inoculated with *Pseudomonas syringae pv maculicola* ES4326 (Psm) carrying the LUX operon from *P. luminescens*. The luminescence per area of leaf disks (RLU) was determined.

Camalexin was determined in leaves inoculated with *Botrytis* (**D**) or Psm (**E**) by HPLC. Data are presented as means and S.D. from 3 independent pools of 6 leaves (3 per plant).

**F** Col-0, *cyp71A27*, and *cyp71A13* plants were treated with AgNO<sub>3</sub> and camalexin was determined in the shoots and roots by HPLC. Data are shown as means and S.D. from three independent pools of at least 10 plants.

Asterisks indicate significant differences to Col-0 at  $p < 0.05$  (one way ANOVA).

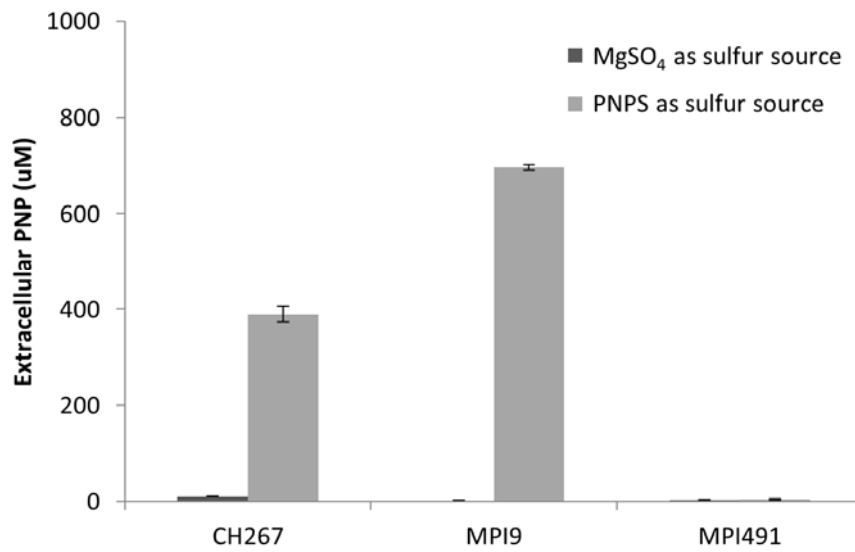

**Fig. S9. Sulfatase activity of CH267, MPI9 and MPI491 bacterial strains.** Bacterial strains were cultivated on an M9 minimal medium using either MgSO<sub>4</sub> or p-nitrophenyl sulfate (PNPS) as the sole sulfur source. After 48 hours growth, bacterial sulfatase activity was quantified by spectrophotometric measurement of p-nitrophenyl (PNP) concentration in the culture supernatant at 400 nm. Shown are means and S.D. from four replicates.

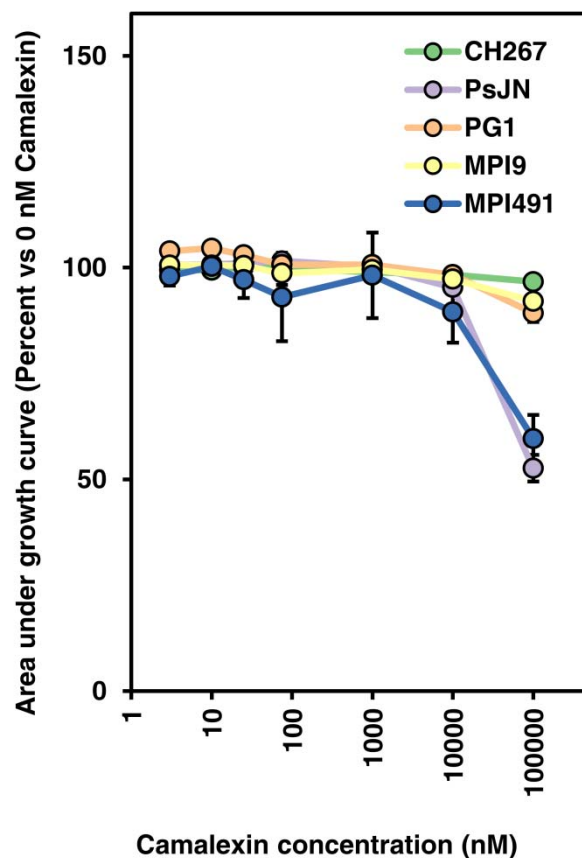

**Fig. S10. Effect of camalexin on bacterial growth.**

Growth of five bacterial strains was measured in the presence of different camalexin concentrations: 0, 3 nM, 10 nM, 25 nM, 75 nM, 1  $\mu$ M, 10  $\mu$ M, and 100  $\mu$ M. Bacteria were cultivated on  $\frac{1}{2}$  TSB medium in 48-well plates in a plate reader at 28°C for 24 h with shaking. For each well, OD600 was measured every 10 min without correcting for path length. Resulting growth curves were quantified by integrating the Area Under Curve (AUC), and AUC values for different camalexin concentrations are normalised versus the 0 camalexin control for that strain. Shown are means and S.D. from three replicates.

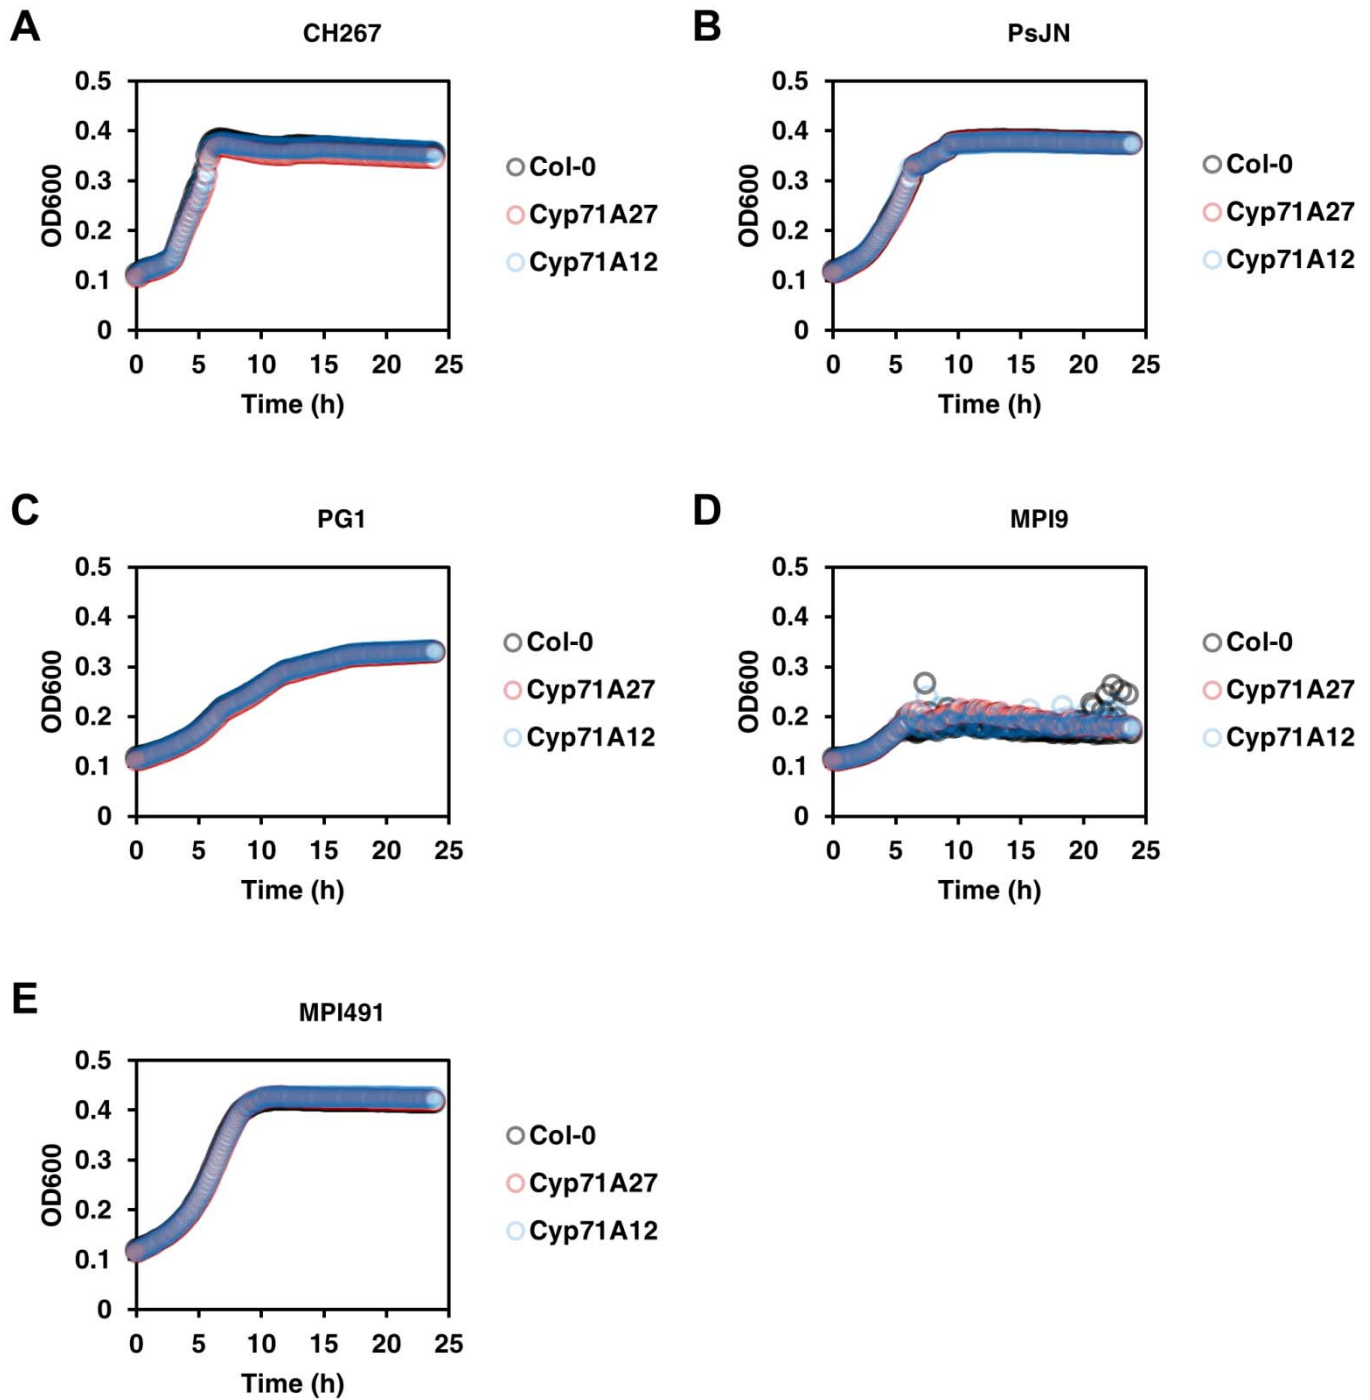

**Fig. S11. Growth of bacteria on root extracts.**

Growth of five bacterial strains was measured in media where the sole carbon source was root extract harvested from different *Arabidopsis* genotypes. M9 minimal media were formulated to contain root extract as the sole carbon source, with a carbon concentration of 720 mg C/l. In a 48-well plate, washed bacterial cells were inoculated into growth media at an OD600 of 0.05, and cultivated in a plate reader at 28°C for 24 h with shaking. For each well, OD600 was measured every 10 min without correcting for path length.

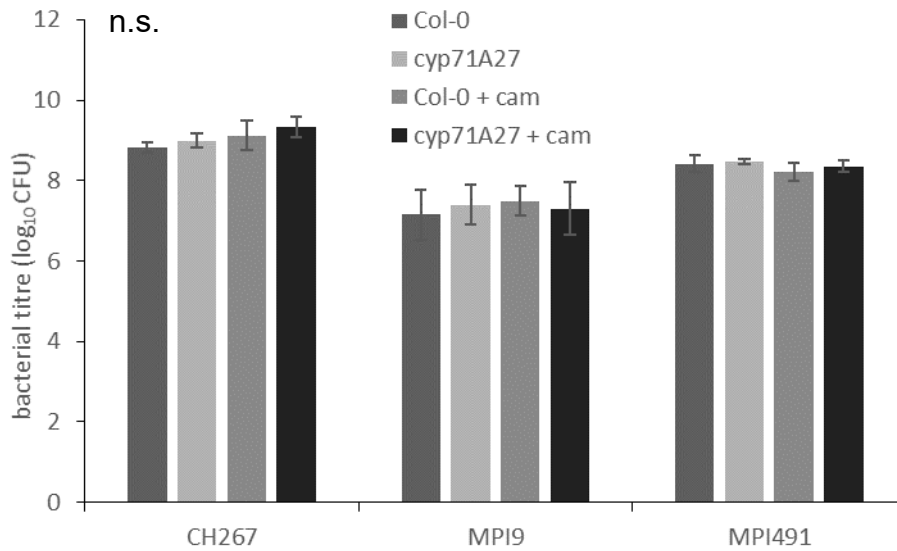

**Fig. S12. Quantification of bacteria in roots.**

Col-0 and *cyp71A27* were grown for 2 weeks in presence *Pseudomonas* sp. CH267, MPI9, and MPI491, with or without addition of 10  $\mu$ M camalexin (cam). The bacterial titre was determined by colony counting. Data are presented as means and S.D. from 8 plates per genotype and treatment and the experiments was independently repeated. n.s. No significant differences for the individual strains were detected.

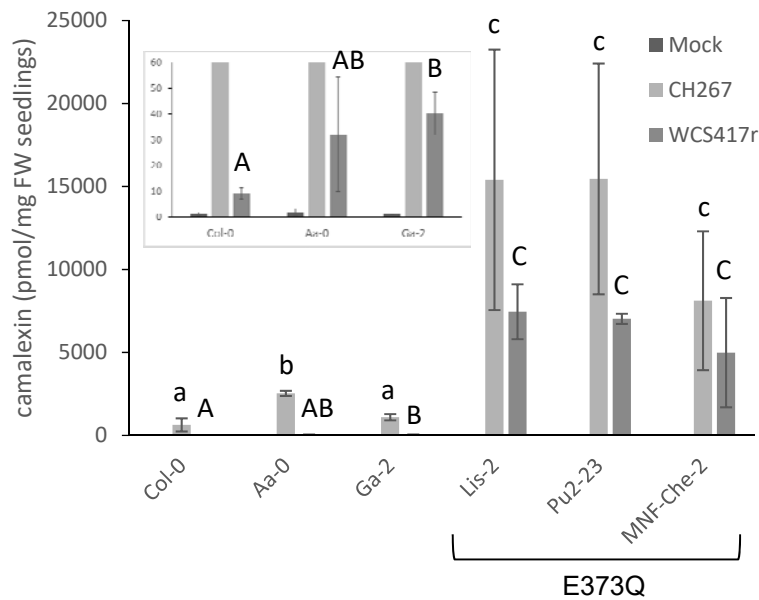

**Fig. S13. Camalexin exudation**

Three representative accessions of the two *CYP71A27* haplotypes were grown for 7 days on sterile 100  $\mu$ m nylon mesh (six seedlings per sample) in 12 well plates placed on 1 ml of  $\frac{1}{2}$  MS medium with 0.5 % sucrose. Seven  $\mu$ l of *Pseudomonas* sp. CH267, *P. simiae* WCS417r cultures diluted to  $OD_{600} = 0.0001$ , or 10  $\mu$ M  $MgCl_2$  as mock were inoculated into each well. The plates were further incubated under the same conditions for 6 days with occasional shaking. Camalexin was determined in the nutrient solution after purification on 1 ml solid phase extraction tubes (Discovery-DSC18) by HPLC.

Data are shown as means and S.D. from four exudate samples from 6 plants, normalized per FW of the whole seedlings. Two way ANOVA confirmed that the camalexin amount depends on haplotype ( $P = 1.7 \times 10^{-5}$ ), treatment ( $P = 8.2 \times 10^{-5}$ ) and haplotype:treatment ( $P = 0.0059$ ). Different letters indicate significantly different values at  $p < 0.05$ .

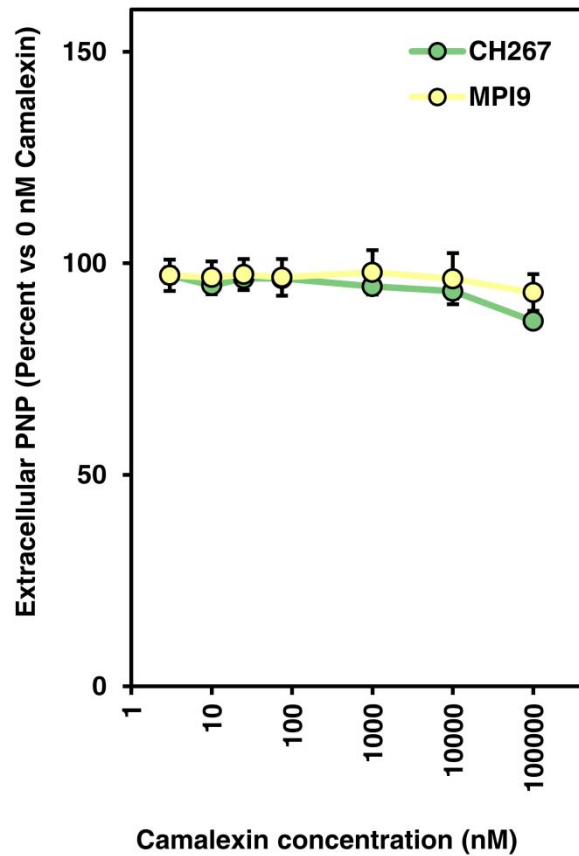

**Fig. S14. Effect of camalexin on bacterial sulfatase activity.**

Bacterial strains were cultivated in a 48-well plate on an M9 minimal medium using p-nitrophenyl sulfate (PNPS) as the sole sulfur source, in the presence of different camalexin concentrations: 0, 3 nM, 10 nM, 25 nM, 75 nM, 1  $\mu$ M, 10  $\mu$ M, and 100  $\mu$ M. (A) Extracellular PNP: After 48 hours growth, bacterial sulfatase activity was quantified by spectrophotometric measurement of p-nitrophenyl (PNP) concentration in the culture supernatant at 400 nm. Shown are means and S.D. from three replicates. (B) Growth rate: For each well, OD600 was measured every 10 min without correcting for path length. Resulting growth curves were fitted against the logistic growth equation, and shown here are the maximum growth rate ( $r$ ) values across different camalexin concentrations. Values are normalised versus the 0 camalexin control for that strain. Shown are means and S.D. from three replicates.



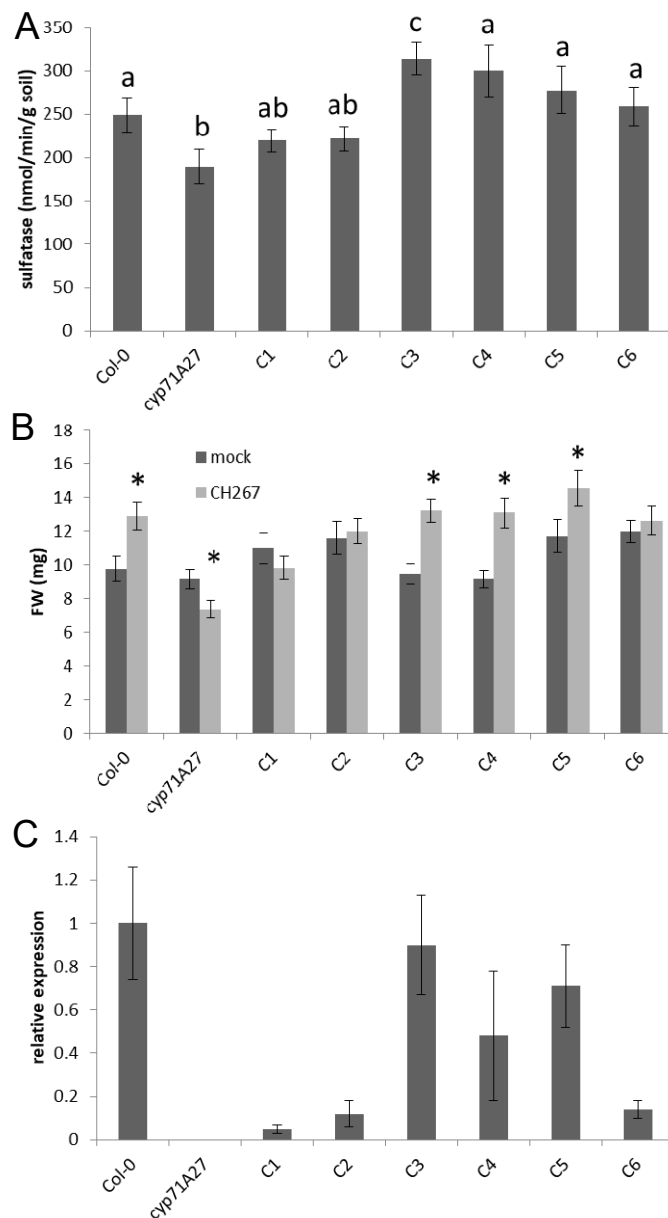

**Fig. S15. Complementation of *cyp71A27* mutant.**

**A** Col-0, *cyp71A27*, and 6 complemented lines were grown for 2 weeks in soil (10%)/sand mixture, afterwards 2 soil samples were taken per plant and sulfatase activity was measured. Data are presented as means and S.E. from 10 samples corresponding to 5 independent plants. Different letters indicate differences significant at  $p < 0.05$  (one way ANOVA).

**B** Col-0, *cyp71A27*, and 6 complemented lines were grown for 2 weeks in presence of *Pseudomonas* sp. CH267 or 10  $\mu\text{M}$   $\text{MgCl}_2$  as mock, and the fresh weight of the whole plants was measured. Data are presented as means and S.E. from at least 20 plants grown on 4 independent plates. Asterisks indicate significant differences between mock and bacterial treatment at  $p < 0.05$  (Student's T-test).

**C** RNA was isolated from roots of the 8 genotypes and *CYP71A27* transcript accumulation was compared by qPCR. The value in Col-0 was set to 1. Data are shown as means and S.D. from three independent plants measured in duplicates.

Supplementary Table S1. Sulfatase activity in soil from 172 *Arabidopsis thaliana* accessions  
 Sulfatase activity (nmol/min/g soil); shown are means from 10 soil samples, corresponding to 5 independent plants and activity relative to Col-0.

| accession     | ID   | mean activity | activity rel. to Col-0 |
|---------------|------|---------------|------------------------|
| Aa-0          | 7000 | 96,24         | 1,13                   |
| Alc-0         | 6988 | 129,47        | 1,52                   |
| ALL1-2        | 1    | 157,67        | 1,85                   |
| ALL1-3        | 2    | 56,96         | 0,67                   |
| Alst1         | 6989 | 269,32        | 3,16                   |
| Amel-1        | 6990 | 95,14         | 1,12                   |
| An-1          | 6898 | 126,97        | 1,49                   |
| Ang-0         | 6992 | 110,68        | 1,30                   |
| Ann-1         | 6994 | 61,79         | 0,73                   |
| App1-16       | 5832 | 144,02        | 1,69                   |
| Baa-1         | 7002 | 104,24        | 1,22                   |
| Be-1          | 7011 | 90,02         | 1,06                   |
| Belmonte-4-94 | 957  | 127,29        | 1,49                   |
| Benk-1        | 7008 | 69,79         | 0,82                   |
| Bg-2          | 6709 | 188,98        | 2,22                   |
| Bil-5         | 6900 | 65,99         | 0,77                   |
| Blh-1         | 8265 | 98,13         | 1,15                   |
| Boot-1        | 7026 | 109,87        | 1,29                   |
| Bor-1         | 5837 | 108,17        | 1,27                   |
| Brö1-6        | 8231 | 220,44        | 2,59                   |
| Bs-2          | 7004 | 67,25         | 0,79                   |
| Bsch-0        | 7031 | 134,97        | 1,58                   |
| Bu-0          | 8271 | 86,39         | 1,01                   |
| Bu-8          | 7056 | 129,50        | 1,52                   |
| Bur-0         | 6905 | 118,23        | 1,39                   |
| C24           | 6906 | 103,50        | 1,22                   |
| Ca-0          | 7062 | 119,10        | 1,40                   |
| Can-0         | 8274 | 164,92        | 1,94                   |
| Cha-0         | 7069 | 141,05        | 1,66                   |
| CIBC-2        | 6727 | 168,85        | 1,98                   |
| CIBC-4        | 6729 | 191,32        | 2,25                   |
| Cit-0         | 7075 | 151,41        | 1,78                   |
| CLE-6         | 78   | 222,04        | 2,61                   |
| Co-2          | 7078 | 46,09         | 0,54                   |
| Co-4          | 7080 | 118,56        | 1,39                   |
| Col-0         | 6909 | 85,17         | 1,00                   |
| Com-1         | 7092 | 97,97         | 1,15                   |
| Cvi-0         | 6911 | 91,29         | 1,07                   |
| Da-0          | 7094 | 60,35         | 0,71                   |
| Di-1          | 7098 | 48,55         | 0,57                   |
| Do-0          | 7102 | 49,40         | 0,58                   |
| Dr-0          | 7106 | 168,03        | 1,97                   |
| Dra-0         | 7103 | 131,31        | 1,54                   |
| Dra3-1        | 8283 | 108,31        | 1,27                   |

|            |      |        |      |
|------------|------|--------|------|
| DraIV.1.5  | 5887 | 126,94 | 1,49 |
| Ede-1      | 7110 | 65,41  | 0,77 |
| Eden-1     | 6009 | 81,76  | 0,96 |
| Es-0       | 7126 | 38,25  | 0,45 |
| Est-0      | 7128 | 124,67 | 1,46 |
| Est-1      | 6916 | 89,20  | 1,05 |
| Fäb-2      | 6917 | 113,59 | 1,33 |
| Fei-0      | 8215 | 45,12  | 0,53 |
| Fja1-1     | 8422 | 73,08  | 0,86 |
| Fja1-5     | 6020 | 121,24 | 1,42 |
| Fr-4       | 7135 | 171,26 | 2,01 |
| Ga-2       | 7141 | 89,76  | 1,05 |
| Ge-0       | 8297 | 132,54 | 1,56 |
| Gel-1      | 7143 | 182,02 | 2,14 |
| Gie-0      | 7147 | 81,07  | 0,95 |
| Go-0       | 7151 | 123,34 | 1,45 |
| Gr-1       | 8300 | 14,86  | 0,17 |
| Gu-1       | 7150 | 111,53 | 1,31 |
| Gul1-2     | 8234 | 149,34 | 1,75 |
| Ha-0       | 7163 | 78,36  | 0,92 |
| Hn-0       | 7165 | 157,45 | 1,85 |
| Hod        | 8235 | 151,61 | 1,78 |
| Hov-3-2    | 6036 | 112,61 | 1,32 |
| Hovdala-2  | 6039 | 87,16  | 1,02 |
| Hs-0       | 8310 | 18,95  | 0,22 |
| HSm        | 8236 | 54,00  | 0,63 |
| In-0       | 8311 | 70,53  | 0,83 |
| JEA        | 91   | 69,68  | 0,82 |
| Jm-1       | 7178 | 90,48  | 1,06 |
| KBS-Mac-8  | 1716 | 86,58  | 1,02 |
| Kin-0      | 6926 | 46,84  | 0,55 |
| Kno-18     | 6928 | 130,41 | 1,53 |
| Krot-0     | 7203 | 109,88 | 1,29 |
| Krot-2     | 7205 | 127,00 | 1,49 |
| Kulturen-1 | 8240 | 295,57 | 3,47 |
| Kyoto      | 7207 | 60,68  | 0,71 |
| LAC-3      | 94   | 91,98  | 1,08 |
| LDV-25     | 116  | 161,90 | 1,90 |
| Ler-1      | 6932 | 107,62 | 1,26 |
| Li-7       | 7231 | 86,46  | 1,02 |
| Lip-0      | 8325 | 326,20 | 3,83 |
| LL-0       | 6933 | 217,31 | 2,55 |
| Lm-2       | 8329 | 134,89 | 1,58 |
| Lom1-1     | 6042 | 167,43 | 1,97 |
| Lov-1      | 6043 | 133,17 | 1,56 |
| Lov-5      | 6046 | 116,55 | 1,37 |
| Mc-0       | 7252 | 98,82  | 1,16 |
| Mh-0       | 7255 | 161,15 | 1,89 |
| MIB-84     | 223  | 80,91  | 0,95 |

|           |      |        |      |
|-----------|------|--------|------|
| MNF-Che-2 | 1925 | 75,80  | 0,89 |
| Mnz-0     | 7244 | 134,54 | 1,58 |
| Mr-0      | 7522 | 76,79  | 0,90 |
| Mrk-0     | 6937 | 113,89 | 1,34 |
| Mv-0      | 7248 | 121,20 | 1,42 |
| N13       | 7438 | 94,25  | 1,11 |
| N7        | 7449 | 114,53 | 1,34 |
| Nc-1      | 7430 | 101,44 | 1,19 |
| NC-6      | 8246 | 85,26  | 1,00 |
| No-0      | 7275 | 45,93  | 0,54 |
| Nyl-13    | 9433 | 143,41 | 1,68 |
| Nz-1      | 7263 | 126,05 | 1,48 |
| Or-0      | 7282 | 99,34  | 1,17 |
| Ors-2     | 7284 | 119,13 | 1,40 |
| Oy-0      | 6946 | 245,67 | 2,88 |
| PAR-4     | 259  | 60,64  | 0,71 |
| Paw-3     | 2150 | 98,72  | 1,16 |
| Pent-1    | 2187 | 14,36  | 0,17 |
| Per-1     | 8354 | 84,32  | 0,99 |
| PHW33     | 7504 | 57,34  | 0,67 |
| PHW-34    | 7505 | 150,49 | 1,77 |
| PHW35     | 7506 | 45,82  | 0,54 |
| PHW36     | 7507 | 64,31  | 0,76 |
| PHW37     | 7507 | 141,02 | 1,66 |
| Pi-0      | 7298 | 45,34  | 0,53 |
| Pla-0     | 7300 | 170,62 | 2,00 |
| Pro-0     | 8213 | 40,69  | 0,48 |
| Pt-0      | 7305 | 50,77  | 0,60 |
| Pu2-23    | 6951 | 49,40  | 0,58 |
| Rak-2     | 8365 | 127,45 | 1,50 |
| Rd-0      | 8366 | 20,43  | 0,24 |
| Ren-1     | 6959 | 231,48 | 2,72 |
| Rev-2     | 6076 | 182,51 | 2,14 |
| Rmx-A180  | 7525 | 95,25  | 1,12 |
| Rou-0     | 7320 | 88,05  | 1,03 |
| RRS-10    | 7515 | 147,84 | 1,74 |
| Sav-0     | 7340 | 119,92 | 1,41 |
| Sei-0     | 7333 | 76,65  | 0,90 |
| Sg-1      | 7344 | 79,41  | 0,93 |
| Shadahra  | 6962 | 48,96  | 0,57 |
| St-0      | 8387 | 132,69 | 1,56 |
| Ste-3     | 2290 | 54,27  | 0,64 |
| T1040     | 6094 | 42,59  | 0,50 |
| T1060     | 6096 | 91,25  | 1,07 |
| T1110     | 6100 | 15,44  | 0,18 |
| T540      | 6112 | 165,52 | 1,94 |
| T620      | 6119 | 93,70  | 1,10 |
| TDr-18    | 6203 | 118,30 | 1,39 |
| Ting-1    | 7354 | 226,55 | 2,66 |

|            |      |        |      |
|------------|------|--------|------|
| Tol-0      | 7356 | 181,41 | 2,13 |
| Tomegap-2  | 6242 | 163,28 | 1,92 |
| Tottarp-2  | 6243 | 101,35 | 1,19 |
| TOU-A1-62  | 328  | 153,77 | 1,81 |
| TOU-E-11   | 366  | 260,62 | 3,06 |
| TOU-H-13   | 374  | 132,01 | 1,55 |
| TOU-K-3    | 386  | 96,07  | 1,13 |
| Ts-1       | 6970 | 49,43  | 0,58 |
| Tscha-1    | 7372 | 72,66  | 0,85 |
| Tsu-0      | 7373 | 39,95  | 0,47 |
| Tul-0      | 7377 | 180,23 | 2,12 |
| Uk-2       | 7379 | 125,52 | 1,47 |
| UKNW06-436 | 5606 | 197,82 | 2,32 |
| UKSE-278   | 5122 | 101,52 | 1,19 |
| UII2-3     | 6973 | 88,56  | 1,04 |
| UII2-5     | 6974 | 40,09  | 0,47 |
| UII3-4     | 6413 | 84,88  | 1,00 |
| Utrecht    | 7382 | 54,82  | 0,64 |
| Van-0      | 7383 | 48,90  | 0,57 |
| Ven-1      | 7384 | 152,46 | 1,79 |
| VOU-1      | 390  | 33,31  | 0,39 |
| Wa-1       | 7394 | 60,68  | 0,71 |
| Wc-2       | 7405 | 60,16  | 0,71 |
| WI-0       | 7411 | 35,68  | 0,42 |
| Ws-0       | 6980 | 138,52 | 1,63 |
| Ws-2       | 6981 | 60,15  | 0,71 |
| X328PNA054 | 8692 | 133,55 | 1,57 |
| Yo-0       | 6983 | 144,79 | 1,70 |
| Zdr-6      | 6449 | 125,76 | 1,48 |
| Zu-1       | 7418 | 85,45  | 1,00 |

Supplementary Table S2. Markers significantly associated with variation in sulfatase  
 Shown are positions of markers with score ( $-\log_{10}P$ ) higher than 4.

| chromosome | position | score | chromosome | position | score |
|------------|----------|-------|------------|----------|-------|
| 5          | 16093269 | 5,781 | 2          | 8060333  | 4,266 |
| 2          | 8948991  | 5,768 | 4          | 7296652  | 4,266 |
| 5          | 18619037 | 5,387 | 1          | 898397   | 4,246 |
| 2          | 6300485  | 5,356 | 3          | 18002103 | 4,229 |
| 4          | 7369340  | 5,306 | 1          | 22960034 | 4,213 |
| 1          | 13052365 | 5,211 | 1          | 17864022 | 4,189 |
| 3          | 21352347 | 5,137 | 3          | 18002412 | 4,182 |
| 1          | 5484572  | 5,112 | 1          | 17600900 | 4,163 |
| 4          | 9865729  | 5,072 | 5          | 8429895  | 4,147 |
| 4          | 9874455  | 5,072 | 3          | 2366209  | 4,145 |
| 4          | 9885694  | 5,072 | 5          | 2685965  | 4,145 |
| 5          | 4734285  | 5,070 | 2          | 8612698  | 4,114 |
| 3          | 4559978  | 5,067 | 2          | 8583271  | 4,093 |
| 2          | 7332044  | 4,830 | 2          | 8586121  | 4,093 |
| 3          | 4574994  | 4,825 | 2          | 10501739 | 4,092 |
| 5          | 19728614 | 4,816 | 4          | 15210413 | 4,067 |
| 5          | 23670216 | 4,810 | 3          | 1145882  | 4,065 |
| 1          | 22744494 | 4,798 | 3          | 12599993 | 4,061 |
| 5          | 8427481  | 4,797 | 5          | 23700786 | 4,056 |
| 4          | 10930013 | 4,780 | 5          | 23705451 | 4,056 |
| 2          | 8588043  | 4,775 | 5          | 23715848 | 4,056 |
| 4          | 12026369 | 4,758 | 5          | 23777633 | 4,056 |
| 5          | 23765316 | 4,687 | 1          | 6895487  | 4,030 |
| 5          | 22814448 | 4,682 | 5          | 1557906  | 4,024 |
| 3          | 4555946  | 4,655 | 3          | 11052579 | 4,016 |
| 3          | 4556265  | 4,655 |            |          |       |
| 2          | 8672858  | 4,611 |            |          |       |
| 5          | 3912479  | 4,575 |            |          |       |
| 3          | 8300660  | 4,529 |            |          |       |
| 5          | 16463903 | 4,508 |            |          |       |
| 5          | 18036619 | 4,441 |            |          |       |
| 5          | 3373458  | 4,409 |            |          |       |
| 1          | 17866252 | 4,407 |            |          |       |
| 1          | 5062465  | 4,404 |            |          |       |
| 5          | 18552017 | 4,386 |            |          |       |
| 5          | 20299888 | 4,358 |            |          |       |
| 4          | 7283307  | 4,339 |            |          |       |
| 5          | 14734084 | 4,329 |            |          |       |
| 2          | 272607   | 4,326 |            |          |       |
| 1          | 2214123  | 4,322 |            |          |       |
| 2          | 272690   | 4,315 |            |          |       |
| 1          | 22744473 | 4,272 |            |          |       |
| 3          | 12912061 | 4,272 |            |          |       |
| 1          | 12073641 | 4,266 |            |          |       |
| 1          | 12111200 | 4,266 |            |          |       |

Supplementary Table S3. Candidate genes for analysis of T-DNA lines.

"gene" is the candidate gene selected within the linkage disequilibrium.

"p sulfatase" represents the p value of the comparison of sulfatase activity with Col-0. Red marks significant differences at p<0.05

| rank | chrom. | position | score    | gene      | annotation                                        | T-DNA line     | p sulfatase | sulfatase activity relative to Col-0 |
|------|--------|----------|----------|-----------|---------------------------------------------------|----------------|-------------|--------------------------------------|
| 2    | 2      | 8948991  | 5,768113 | At2g20780 | MRS<br>Major facilitator superfamily protein      | SAIL_759_E05   | 0,35        | 0,9                                  |
| 3    | 5      | 18619037 | 5,386588 | At5g45875 | family of small, secreted, cysteine rich proteins | SALK_089063    | 0,14        | 0,72                                 |
| 4    | 2      | 6300485  | 5,356145 | At2g14750 | APK1<br>APS kinase 1                              | SALK_053427    | 0,41        | 1,06                                 |
| 7    | 3      | 21352347 | 5,13653  | At3g57650 | LPAT2<br>lysophosphatidyl transferase             |                |             |                                      |
| 8    | 1      | 5484572  | 5,112086 | At1g15950 | CCR1<br>cinnamoyl CoA reductase                   | GK-622C01      | 0,007       | 0,46                                 |
| 13   | 3      | 4559978  | 5,066509 | At3g13870 | RHD3<br>root hair defective                       |                |             |                                      |
| 18   | 1      | 22744494 | 4,797908 | At1g61680 | TPS14<br>terpene synthase                         |                |             |                                      |
| 20   | 4      | 10930013 | 4,77969  | At4g20235 | CYP71A28<br>cytochrome P-450                      | SALK_064792C   | 0,04        | 0,49                                 |
|      |        |          |          | At4g20240 | CYP71A27<br>cytochrome P-450                      | SALK_053817C   | 0,04        | 0,63                                 |
| 21   | 2      | 8588043  | 4,775429 | At2g19880 | GCS<br>Glucosylceramide synthase                  |                |             |                                      |
| 24   | 5      | 22814448 | 4,681923 | At5g56360 | PSL4<br>defense response to bacterium,            | SALK_039458C   | 0,27        | 0,87                                 |
| 29   | 3      | 8300660  | 4,529327 | At3g23240 | ERF1<br>ethylene response factor                  |                |             |                                      |
| 31   | 5      | 18036619 | 4,440517 | At5g44620 | CYP706A3<br>cytochrome P-450                      |                |             |                                      |
|      |        |          |          | At5g44630 | Sesquiterpene synthase                            | SALK_151777C   | 0,33        | 0,92                                 |
| 33   | 1      | 17866252 | 4,406965 | At1g48370 | YSL8<br>metal-nicotianamine transporter           | SALK_076262_10 | 0,03        | 0,54                                 |
|      |        |          |          | At1g48380 | RHL1<br>ROOT HAIRLESS 1                           |                |             |                                      |
| 34   | 1      | 5062465  | 4,403505 | At1g14700 | PAP3<br>purple acid phosphatase 3                 | SALK_081178    | 0,04        | 0,67                                 |
| 49   | 3      | 18002103 | 4,228665 | At3g48560 | AHAS<br>Acetohydroxy Acid Synthetase              |                |             |                                      |
| 50   | 1      | 22960034 | 4,21292  | At1g62180 | APR2<br>APS reductase 2                           | GABI_108G02    | 0,16        | 1                                    |
| 54   | 5      | 8429895  | 4,146978 | At5g24655 | LSU2<br>Low Sulfur 2                              | SALK_069114    | 0,04        | 0,73                                 |
|      |        |          |          | At5g24660 | LSU4<br>Low Sulfur 4                              | SALK_031648C   | 1,17        |                                      |
| 59   | 2      | 8586121  | 4,092993 | At2g19860 | HXK2<br>hexokinase 2                              |                |             |                                      |
| 68   | 1      | 6895487  | 4,029585 | At1g19920 | ATPS2<br>ATP sulfurylase 2                        | SAIL775D12     | 0,49        | 1                                    |
| 69   | 5      | 1557906  | 4,024213 | At5g05260 | CYP79A2<br>cytochrome P-450                       | GK-913H04      | 0,13        | 0,74                                 |

Supplementary Table S4. T-DNA lines used for analysis

| gene      | annotation                                        | homozygous T-DNA line | primers for verification of T-DNA insertion |                        |
|-----------|---------------------------------------------------|-----------------------|---------------------------------------------|------------------------|
| At2g20780 | Major facilitator superfamily protein             | SAIL_759_E05          | gcgatgtagacaggagcg                          | gaatctccggagggttg      |
| At5g45875 | family of small, secreted, cysteine rich proteins | SALK_089063           | ttagcaaggagaatatggaaa                       | atgaagtctactacctgttc   |
| At2g14750 | APS kinase 1                                      | SALK_053427           | gcttcgatggcttctc                            | gacccaaatcacacatcc     |
| At1g15950 | cinnamoyl CoA reductase                           | GK-622C01             | gtcgacgtagcctcacc                           | cttgacctggcctcagc      |
| At4g20235 | cytochrome P-450                                  | SALK_064792C          | cctgccgaggagatgg                            | gcttcaccacttcttagc     |
| At4g20240 | cytochrome P-450                                  | SALK_053817C          | ttccaatctctccgtagg                          | gtctcctcccaagcgag      |
| At5g56360 | defense response to bacterium,                    | SALK_039458C          | ccttcagctgctggctc                           | aattgagaaggtagaggag    |
| At5g44630 | Sesquiterpene synthase                            | SALK_151777C          | gggacttgagagattgg                           | tctacgagcaaaagcctc     |
| At1g48370 | metal-nicotianamine transporter                   | SALK_076262_10        | gccatgcaatagcagacc                          | tagcgacagctatgaacac    |
| At1g14700 | purple acid phosphatase 3                         | SALK_081178           | ctaactctcaatggctacc                         | aaggtttctgcaagctcg     |
| At1g62180 | APS reductase 2                                   | GABI_108G02           | gtgtcttaagggtcttaaa                         | ctcacaccgattgacac      |
| At5g24655 | Low Sulfur 2                                      | SALK_069114           | gatccaacaatctaagaacc                        | gaaaaggaggaaactatgtg   |
| At5g24660 | Low Sulfur 4                                      | SALK_031648C          | agccgataagaggatacatc                        | ttagatcaaagtaaaatggtcc |
| At1g19920 | ATP sulfurylase 2                                 | SAIL775D12            | tctcaatttggctataaacg                        | ttaaaggactagcccaacc    |
| At5g05260 | cytochrome P-450                                  | GK-913H04             | ttcgtccgacagagtagg                          | cattaactatgaagcgaagg   |
|           |                                                   | SALK LB primer        | atthtgcgatttcggaac                          |                        |
|           |                                                   | GABI LB primer        | atattgaccatcatactcattgc                     |                        |



Supplementary Table S5. Bacterial strains used.

|                                           | NCBI<br>Taxonomy<br>ID | antibiotics<br>resistance | sulfatase<br>activity | ref. |
|-------------------------------------------|------------------------|---------------------------|-----------------------|------|
| <i>Pseudomonas</i> sp. CH267              | 1634009                | ampicillin                | +                     | (26) |
| <i>Pseudomonas simiae</i> WCS417r         |                        | rifampicin                | -                     | (27) |
| <i>Paraburkholderia phytofirmans</i> PsJN | 398527                 | gentamicin                | -                     | (28) |
| <i>Pseudomonas</i> sp. Root9 (MPI9)       | 1736604                |                           | +                     | (4)  |
| <i>Rhizobium</i> sp. Root491 (MPI491)     | 1736548                |                           | -                     | (4)  |
| <i>Burkholderia glumae</i> PG1            | 595500                 | chloramphenicol           | +                     | (29) |

The NCBI Taxonomy number is included when available. Presence of sulfatase activity determined experimentally as production of p-nitrophenyl during growth on p-nitrophenyl sulfate.

Supplementary Table S6. Oligonucleotide primers used

qPCR

|                 |                  |              |                           |              |                          |
|-----------------|------------------|--------------|---------------------------|--------------|--------------------------|
| <b>TIP41</b>    | <i>AT4G34270</i> | TIP41-F      | gaactggctgacaatggagtg     | TIP41-R      | atcaactctcagccaaaatcg    |
| <b>CYP71A12</b> | <i>AT2G30750</i> | CYP71A12-F   | tgtgggtgttgccctatg        | CYP71A12-R   | ttgttcgtgagcagattgaga    |
| <b>CYP71A13</b> | <i>AT2G30770</i> | CYP71A13-F   | gatgttggttgcctccctatg     | CYP71A13-R   | ttgttggtgagcagattgaga    |
| <b>CYP71A27</b> | <i>AT4G20240</i> | CYP71A27-F   | ccctacggagaagattggaa      | CYP71A27-R   | ccagcttctctgcattacttga   |
| <b>CYP71A28</b> | <i>AT4G20235</i> | CYP71A28-F   | ttctcctctacggcgaata       | CYP71A28-R   | gaggagatggacagtcataaa    |
| <b>GST6</b>     | <i>AT2G47730</i> | GST6-F       | aagcaagaggccacctt         | GST6-R       | tcttgactcgaaaagcgtca     |
| <b>GGP1</b>     | <i>AT4G30530</i> | GGP1-F       | tgtcaagaaaattgatgagatgaag | GGP1-R       | ccccttaccctggctatgat     |
| <b>CYP71B15</b> | <i>AT3G26830</i> | CYP71B15-F   | caccactgatcatctcaaagga    | CYP71B15-R   | cggtcattccccatagtggt     |
| <b>MAM</b>      | <i>At5g23020</i> | MAM-F        | ccgtgaacagtgtaagtacgc     | MAM-R        | caccgcgtttatcgattct      |
| <b>TSB</b>      | <i>At5g54810</i> | TSB-F        | acgaagaagcgttggaagc       | TSB-R        | ggtaagctagtcggtgtagg     |
| <b>CYP79F1</b>  | <i>AT1G16410</i> | CYP79F1-F    | agaccgatcttgccagctt       | CYP79F1-R    | ggtagattgccgagatgg       |
| <b>CYP79B2</b>  | <i>AT4G39950</i> | CYP79B2-F    | tgcggatcccaacaaaaag       | CYP79B2-R    | atgatcggccatcctgtg       |
| <b>MYB28</b>    | <i>AT5G61420</i> | MYB28-F      | tggaccaactacctaaacctga    | MYB28-R      | tctcgctatgaccgaccact     |
| <b>MYB51</b>    | <i>AT1G18570</i> | MYB51-F      | ggccaattatcttagacctgaca   | MYB51-R      | ccacgagctatagcagaccatt   |
| <b>SUR1</b>     | <i>At2g20610</i> | SUR1-F       | ggattctccccgaagac         | SUR1-R       | catccagcggcagaaaa        |
| <b>SOT16</b>    | <i>At1g74100</i> | SOT16-F      | cgaagtcgctgaactcacagagtt  | SOT16-R      | aaagacctcgaggagacattcttg |
| <b>SOT17</b>    | <i>At1g18590</i> | SOT17-F      | ggaatccaaaaccataaacgacg   | SOT17-R      | cggatcttttggctccagcc     |
| <b>UBQ5</b>     | <i>At3g62250</i> | AtUBI_F      | ccaagccgaagaagatcaag      | AtUBI_R      | actcctctcaaacgatga       |
| <b>PiTEF</b>    |                  | 03008_QPCR_F | gcaagttctccgagctcatc      | 03008_QPCR_R | ccaagtggtgggtactcggt     |

cloning

|             |                            |
|-------------|----------------------------|
| CYP27PROFOR | caccttgacctatacttactacc    |
| CYP27PROREV | attgtgcttatttagaatgg       |
| CYP27FOR    | caccctatttaagtattttattggac |
| CYP27REV    | tcacaaggttgctagtc          |
